# Supplementary material for: Cloning and Transcriptional Activity of the Mouse Omi/HtrA2 Gene Promoter
Source: PubMed Central journal article supplement (PMC4730360; doi:10.3390/ijms17010119), 2016-01-16
Supplement: ijms-17-00119-s001.pdf [file ijms-17-00119-s001.pdf]

## Supplementary Materials: Cloning and Transcriptional Activity of the Mouse *Omi/HtrA2* Gene Promoter

Dan Liu, Xin Liu, Ye Wu, Wen Wang, Xinliang Ma and Huirong Liu

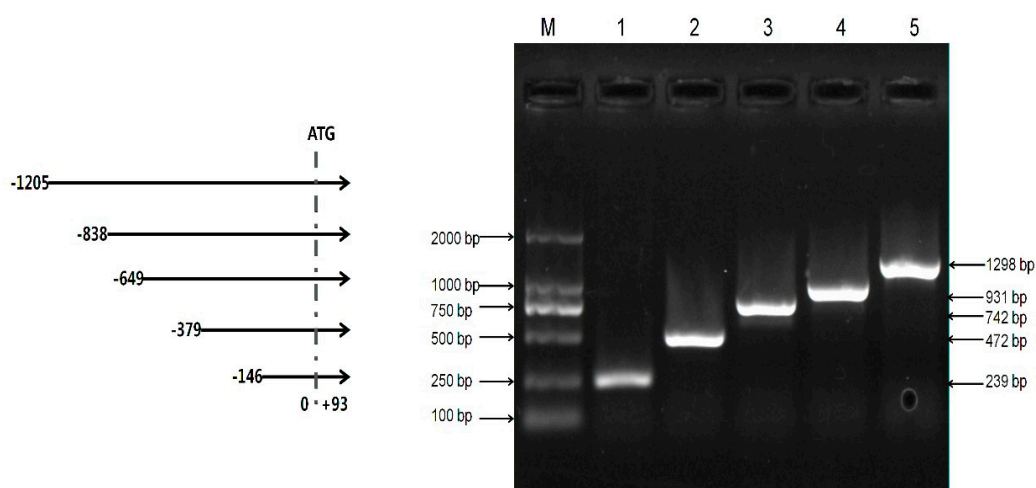

**Figure S1.** PCR amplification of the mouse *Omi/HtrA2* gene promoter. *Omi/HtrA2* promoter fragments were amplified using F1–F5 as upstream primers and R as a downstream primer. M: DL2000 Marker; 1: 239 bp; 2: 472 bp; 3: 742 bp; 4: 931 bp; 5: 1298 bp.
